# Supplementary material for: Predicting protein–protein interactions between human and hepatitis C virus via an ensemble learning method
Source: Royal Society of Chemistry journal article supplement (doi:10.1039/c4mb00410h), 2014-09-12
Supplement: c4mb00410h1.xlsx [file c4mb00410h1.xlsx]

## Sheet: GO BP
Category	Term	PValue	Genes	List Total	Pop Hits	Pop Total	Fold Enrichment	Bonferroni	Benjamini	FDR
GOTERM_BP_1	GO:0051704~multi-organism process	6.07419e-14	Q99816, Q16531, Q9UHD2, P36897, Q9H6F5, P42224, Q07021, O00571, Q14240, P27918, P61769, P11142, P27986, P62993, O43889, P61978, P28799, P52294, P02788, P05556, Q9NY15, P35354, Q9NNX6, O00499, Q7Z434, P04637, P05412, P37173, O95292, P62258, Q6FHJ7, O00410, O15162, Q99836, P06239, P21675, Q8WTV0, Q96BZ9, P05141, P08670, P01009, P08631, P06241, P02652, Q6ZRS2, P07948, P19793, P60033, P19525, P36941,…	415	681	14051	2.98307	1.33604e-12	1.33604e-12	4.75286e-11
GOTERM_BP_1	GO:0016043~cellular component organization	2.27504e-09	P04114, P51636, Q8IUQ4, Q5VT25, Q96EY1, O60711, P07737, P11142, P17661, P05556, P08572, Q8TEX9, Q13464, Q15154, Q5XG79, O00499, P46939, P02649, O15230, P55209, Q9BV73, Q07812, Q14683, O95466, P02647, O00410, Q96N67, Q9H0F6, P35222, P35609, Q8WTV0, P12814, P46531, P22307, Q13099, P02652, P07197, Q15276, Q15485, Q96MT8, Q9UBX5, Q9NP72, Q96P48, P16144, P07196, P55268, Q9H2D6, O75907, Q9NZM3, P04049,…	415	2498	14051	1.66714	5.00509e-08	2.50255e-08	1.78053e-06
GOTERM_BP_1	GO:0009987~cellular process	9.91955e-09	Q8N1W1, P27540, P04114, O75962, Q5VT25, Q9NP80, P82094, O60711, P00167, Q15717, P55196, Q8IYH5, Q8NFF5, P07737, P11142, P28062, O43294, Q86XR8, P17661, P28065, O14594, O60504, P68104, Q96GW7, Q9Y2K1, P10515, Q13464, Q8NEF9, P04035, Q9BQ52, P46939, Q9Y5W7, Q8IUX7, O15230, P28070, Q9P2E9, Q9BV73, P55209, P62258, Q07812, P09758, Q92932, Q8N302, Q9P2E2, O00410, O95248, Q8WUF5, P06239, P41225, Q99435,…	415	10541	14051	1.1499	2.1823e-07	7.27434e-08	7.76338e-06
GOTERM_BP_1	GO:0065007~biological regulation	6.41066e-07	Q8N1W1, P27540, P04114, O75962, P08603, Q5VT25, P82094, O60711, Q15717, P55196, Q8IYH5, P07737, P61769, P11142, P28062, Q08830, O43294, Q9GZN7, P17661, P28065, O14594, O60504, P98095, Q96GW7, Q9Y2K1, Q13464, Q8NEF9, P04035, Q7Z434, Q8IUX7, O15230, P28070, Q9P2E9, Q9BV73, P62258, Q07812, P55209, Q8N302, P06239, Q8WUF5, P41225, Q99435, Q9UBW7, P35609, P10643, Q8WTV0, P22309, Q13315, P46531, Q9Y5V3,…	415	7484	14051	1.22149	1.41034e-05	3.52586e-06	0.000501719
GOTERM_BP_1	GO:0016265~death	4.0313e-06	Q9UHD4, O14763, Q8WUF5, P42224, P06239, Q58EX7, O75962, O15169, Q8IUQ4, Q96EY1, Q13164, Q9H0F6, P35222, Q96CV9, P10643, Q13315, Q16548, Q9Y5V3, P61289, O43866, Q8NF91, Q15052, Q86WV6, P07996, P00734, Q15276, P19525, Q13464, P36941, Q5VST9, Q16584, P04637, P04049, P37198, P05412, O95292, Q13625, Q14318, P62258, Q07812, Q9UKK3, P14618, Q9UQ90, P78344, P29590	415	724	14051	2.10442	8.86848e-05	1.77376e-05	0.00315499
GOTERM_BP_1	GO:0022610~biological adhesion	2.16722e-05	P02751, P14209, P25311, Q9Y2D8, P29279, O60711, Q99435, P35222, P35609, Q8WTV0, P55196, P12814, P56945, Q9HBI0, Q4LDE5, O43294, O14594, P07996, O60504, Q9HCU4, Q9Y6N6, P05556, P14543, Q14112, Q96GW7, Q9NY15, Q03001, Q9UBX5, Q13464, P16144, P08493, Q9NNX6, P55268, Q92832, Q8IUX7, O15230, P20701, P04275, Q9HCB6, Q9H2X3, Q8N302, P13611	415	701	14051	2.02857	0.00047668	7.94625e-05	0.0169602
GOTERM_BP_1	GO:0051179~localization	0.000613482	Q99816, Q96QK1, P04114, P51636, P00167, P11142, Q9NRA8, Q86XR8, Q9ULU8, P05556, P02749, Q8TEX9, Q13464, Q9H0Q3, P04035, O00499, Q9Y5W7, P02649, Q9P2E9, O15230, P62258, Q9BV73, Q07812, P02647, Q9P2E2, O00410, P06239, P35222, Q8WTV0, P22307, Q13099, P06241, P02652, Q53X94, P07948, P07197, Q15276, Q15485, Q9NP72, P07196, Q9Y3M2, O75907, Q9NZM3, Q13438, O60664, Q8TD31, O75093, P53367, Q14764, O75306,…	415	2993	14051	1.32354	0.01341	0.00192682	0.479128
GOTERM_BP_1	GO:0050896~response to stimulus	0.000712447	Q16531, Q9UHD4, P27540, Q9UHD2, P04114, P05546, P51636, P08603, Q96EY1, P61769, P11142, P28062, Q13137, P38936, P28065, P05556, P02749, P35354, P04035, P41567, Q7Z434, P02649, P08238, Q07812, Q14683, P09758, Q99836, P06239, Q15166, Q14164, P35222, P10643, Q8WTV0, P22309, Q13315, P46531, Q16644, Q9UNS2, P01009, P06241, P02652, P07948, Q15485, Q96MT8, P19525, Q9UBX5, P07196, Q9P035, P55268, O95967,…	415	3502	14051	1.28586	0.0155571	0.00195801	0.556232
GOTERM_BP_1	GO:0002376~immune system process	0.000929269	Q99836, P36897, Q9UHD2, P06239, P25311, Q07021, P08603, P15814, Q96EY1, Q14164, P41182, P35222, P68371, P10643, P27918, Q15125, P46531, P61769, P56945, P27986, P28062, P06241, Q13137, Q86WV6, Q9GZN7, P28065, P07996, P01024, P07948, Q9Y219, P02788, P05556, Q15485, Q13464, Q9NNX6, Q7Z434, P55347, P04637, P37173, P32456, Q07812, P20701, Q9H2X3, Q92597, P0C0L4, P02794, P29590, P81172	415	998	14051	1.62843	0.0202457	0.00227002	0.724975
GOTERM_BP_1	GO:0040011~locomotion	0.00102971	P02751, P36897, P04114, P05546, P51636, P29279, O94813, Q8WTV0, P56945, O43889, P06241, P07996, P05556, P60033, Q13464, P07196, P04035, Q9NNX6, Q04941, O15230, P62258, Q07812, P20265, Q9H2X3, P02647, P13611	415	431	14051	2.04247	0.0224104	0.00226397	0.803062
GOTERM_BP_1	GO:0032502~developmental process	0.00133318	Q14999, Q99816, Q8N1W1, P27540, P04114, P51636, Q8IUQ4, Q96EY1, Q15717, P07737, Q96H12, O43294, Q86XR8, Q9GZN7, P38936, Q96GW7, P05556, P02749, P35354, Q15154, Q5XG79, P04035, O00499, P46939, O95789, Q8IUX7, P02649, O15230, P62258, Q07812, P67809, Q8N302, Q6FHJ7, P02647, P06239, P41225, Q96N67, Q9H0F6, P35222, Q15125, Q13315, P46531, Q9UNS2, Q13099, P06241, P02652, P07948, P07197, P07196, P55268,…	415	3148	14051	1.29064	0.0289229	0.00266457	1.03865
GOTERM_BP_1	GO:0000003~reproduction	0.00394225	Q99816, P36897, O95248, P04114, P02753, Q9H0D6, P41225, P14373, O15169, P51636, Q8IUQ4, P41182, Q13315, P46531, Q9NRD5, O43889, Q86XR8, Q9NQB0, P28799, Q9Y219, P19793, Q9HCU4, P05556, P60033, P35354, P04035, Q9NNX6, P62937, Q06481, Q96SI9, P37173, O75398, O95292, Q07812, Q9H2X3, Q6FHJ7, P40763	415	767	14051	1.6333	0.0832322	0.00721559	3.04414
GOTERM_BP_1	GO:0016032~viral reproduction	0.00481319	Q99816, P62937, O95292, P60033, O43889, Q13137, Q9H2X3, Q9NNX6	415	71	14051	3.81497	0.100706	0.00813182	3.70566
GOTERM_BP_1	GO:0022414~reproductive process	0.00614698	Q99816, P36897, O95248, P04114, P02753, Q9H0D6, P41225, P14373, O15169, P51636, Q8IUQ4, P41182, Q13315, P46531, Q9NRD5, O43889, Q86XR8, Q9NQB0, P28799, Q9Y219, P19793, Q9HCU4, P05556, P60033, P35354, P04035, Q9NNX6, P62937, Q06481, Q96SI9, P37173, O75398, O95292, Q07812, Q9H2X3, Q6FHJ7	415	762	14051	1.59958	0.126853	0.00964256	4.7111
GOTERM_BP_1	GO:0051234~establishment of localization	0.00827491	Q99816, Q96QK1, P04114, P51636, P00167, P11142, Q9NRA8, Q86XR8, Q9ULU8, P02749, Q8TEX9, Q9H0Q3, O00499, Q9Y5W7, P02649, Q9P2E9, P62258, Q07812, P02647, Q9P2E2, O00410, P06239, P35222, Q8WTV0, P22307, Q13099, P06241, P02652, P07948, Q53X94, P07197, Q15276, Q15485, Q9NP72, P07196, O75907, Q9NZM3, O60664, O75093, Q8TD31, Q14764, P53367, O75306, P02794, P07355, P41182, P09651, P00734, Q9UBK9, P51571,…	415	2656	14051	1.26202	0.16707	0.0121131	6.29623
GOTERM_BP_1	GO:0044085~cellular component biogenesis	0.00830373	P02751, P04114, P14373, P51636, P21675, Q9Y2W2, O60711, P35222, P68371, P35609, P12814, P07900, Q9NRD5, P62993, Q9UPY3, P02652, P02679, P05556, P02675, P07197, Q96MT8, Q8TEX9, Q13464, P16144, P08493, P21333, Q15154, Q5XG79, P07196, Q9ULW6, Q16584, O75907, P04637, P02649, O15230, P55209, Q07812, P04275, P53365, Q9P219, O95613, P02647, P29590, O00410	415	1001	14051	1.48826	0.167602	0.0113998	6.31753

## Sheet: GO MF
Category	Term	PValue	Genes	Fold Enrichment	Bonferroni	Benjamini	FDR
GOTERM_MF_1	GO:0005488~binding	1.14122e-11	Q8N1W1, P27540, O75962, Q9NP80, Q9BR76, P00167, P55196, P07737, Q8IYH5, P28062, Q08830, P17661, O14594, P98095, Q96GW7, Q13464, P46939, Q9BQ52, O95789, O15230, Q9BV73, Q07812, Q92932, Q9P2E2, Q8WUF5, Q99435, Q13451, Q9UBW7, Q13315, Q4LDE5, P22307, P01009, P07948, Q9UBX5, Q96P48, P16144, Q9NP72, Q9NP73, Q969X0, O95967, Q13435, Q13438, Q9HCB6, O75093, O75094, P14618, O75095, O15084, P0C0L4, P40763,…	1.13067	1.25534e-10	1.25534e-10	7.1092e-09
GOTERM_MF_1	GO:0005198~structural molecule activity	0.000187509	P02751, O94875, P60709, Q7Z7M0, Q99435, P35609, P68371, P08670, P17661, P07996, O60504, P98095, Q9P0L0, Q02543, Q9Y6N6, P07197, P08572, Q15485, P08493, Q5XG79, P07196, P23142, P55268, P35555, Q5VST9, Q92832, O95967, Q13813, P37198, O15230, O95292, P20700, P14136, P67936, O75094, Q75N90	1.96223	0.00206067	0.00103087	0.116751
GOTERM_MF_1	GO:0030234~enzyme regulator activity	0.000357662	Q8N1W1, P07355, P04196, P02751, O14763, P05546, Q58EX7, O75962, P36406, Q96N67, Q5VT25, Q9Y2W2, P67870, Q96EY1, Q96BZ9, P07900, P27986, Q15052, Q9UJF2, P01009, P38936, P01024, P02652, P02749, Q15276, P19525, Q96P48, Q9P035, Q5VST9, Q9UPU7, Q9NZM3, A7KAX9, P05412, Q06481, P02649, Q6Q788, P08238, P02647, P0C0L4, Q13227, Q9BQ16, O00410, Q13576	1.7711	0.00392725	0.0013108	0.222596

## Sheet: GO CC
Category	Term	PValue	Genes	Fold Enrichment	Bonferroni	Benjamini	FDR
GOTERM_CC_1	GO:0044422~organelle part	3.30269e-08	Q14999, Q16531, Q99816, Q8TEP8, P04196, P04114, P36406, P51636, Q9NP80, O00571, Q96EY1, P82094, P00167, Q14141, P61769, P28062, P05455, O43294, Q86XR8, P38936, P17661, Q9P0V9, P08962, P61978, Q96GW7, P35354, P10515, Q13464, Q8TEX9, Q15154, P80303, P17844, P04035, P46939, Q7Z434, O95789, Q5MIZ7, Q9P2E9, P28070, Q07812, Q9BV73, P55209, Q14683, P67936, Q9Y6A9, Q9P2E2, P02647, O00410, P06239, Q5VU43,…	1.43249	3.63296e-07	3.63296e-07	2.0574e-05
GOTERM_CC_1	GO:0043226~organelle	4.75331e-08	Q8TEP8, P27540, P04114, Q9NP80, Q9BR76, P82094, P00167, Q15717, Q8IYH5, P07737, P61769, P11142, P28062, O43294, Q86XR8, Q7L4P6, Q9UHL4, P17661, P28065, O60504, Q96GW7, Q9Y2K1, P10515, Q13464, Q8NEF9, P04035, Q9BQ52, P46939, Q7Z434, O95789, Q5MIZ7, Q8IUX7, P28070, Q9P2E9, Q9BV73, P62258, Q07812, P55209, Q9P2E2, O00410, Q02818, O95248, P06239, Q8WUF5, P41225, Q5VU43, Q13451, Q9UBW7, P35609, Q86UP2,…	1.21406	5.22864e-07	2.61432e-07	2.96106e-05
GOTERM_CC_1	GO:0044421~extracellular region part	5.23747e-07	P07355, P04114, P08603, O94813, P27918, Q08830, P01024, O14594, P00734, P98095, P28799, P02679, P02787, P14543, Q9Y6N6, Q96GW7, P02749, P02675, P08572, Q8N2S1, Q5XG79, Q9H0Q3, P80303, P02649, O15230, P04275, P02647, Q75N90, Q6FHJ7, P13611, Q9BQ16, Q02818, Q9UHF1, P02751, P02753, P29279, Q15166, Q9H8L6, O43866, P01009, P07996, P02652, Q14112, Q03001, Q15485, Q9UBX5, P08493, P23142, P55268, P35555,…	2.03126	5.7612e-06	1.9204e-06	0.000326266
GOTERM_CC_1	GO:0032991~macromolecular complex	1.36103e-06	Q14999, P04114, Q9HAU4, P51636, Q9Y2D8, Q96EY1, Q14141, P61769, P11142, P28062, P05455, Q08830, Q86XR8, P53396, P38936, P17661, Q9P0V9, P61978, P28065, P68104, P05556, P02749, P35354, Q8TEX9, P10515, P17844, P46939, P02649, O15230, Q9P2E9, P28070, Q07812, P55209, Q9BV73, P67809, Q14683, Q9Y6A9, Q9P2E2, P02647, O00410, Q9UMX0, P35222, P10643, P35609, Q9Y5V3, Q9UNS2, P02652, P07948, P07197, Q15485,…	1.46385	1.49713e-05	3.74284e-06	0.000847849
GOTERM_CC_1	GO:0031974~membrane-enclosed lumen	0.000122143	Q16531, P04196, Q99816, P61201, P04114, P42224, Q9H0D6, P14373, Q07021, P60709, Q96EY1, O00571, P53350, Q9BWF3, P05455, O43294, Q9NVV9, P38936, P50440, P61978, P09651, Q9NQB0, P11498, P02679, P52294, Q9HCS7, P02675, P35354, P10515, P17844, P55347, P04637, O95789, P05412, P38117, P20700, P02647, P19338, O00410, P02751, P21675, Q9Y2W2, Q13164, Q9UBW7, P35222, P35609, Q9UJX2, P12814, Q13315, P05141,…	1.51147	0.00134275	0.000268695	0.0760643
GOTERM_CC_1	GO:0005576~extracellular region	0.000603507	P04196, P07355, P04114, P05546, P08603, O94813, P27918, P61769, Q08830, P26927, P01024, O14594, P00734, P98095, P28799, P02679, P02787, P02788, Q96GW7, P14543, Q9Y6N6, P02675, P02749, P08572, Q8N2S1, Q9BTY2, P21333, Q5XG79, Q9H0Q3, P80303, Q9NNX6, Q92832, Q8IUX7, P02649, O15230, O60687, P04275, Q8N302, P02647, Q75N90, Q6FHJ7, P13611, Q9BQ16, P02750, Q9UHF1, Q02818, P02751, P02753, P25311, P29279,…	1.4297	0.00661858	0.00110615	0.37536
GOTERM_CC_1	GO:0031975~envelope	0.00900999	P14373, P03905, P00167, Q56VL3, P05141, Q8NF91, P45973, P06241, Q86WV6, P50440, Q15388, P07948, P11498, P52294, P00414, Q06055, Q8TEX9, P80303, Q7Z434, P04049, P37198, Q14318, Q07812, P20700, Q9HAP2, Q14764, P18850, O75306, O00410, P29590	1.65004	0.0947635	0.0141221	5.48219
GOTERM_CC_1	GO:0045202~synapse	0.0970747	P05556, Q96GW7, P07197, Q8IUQ4, Q5XG79, O00499, P46939, P35222, A7KAX9, Q86UW7, Q9NRD5, Q8NF91, Q9NSC5, Q9ULU8, P17661, P07948	1.54189	0.674785	0.130997	47.0661

## Sheet: Reactome
Category	Term	PValue	Genes	Fold Enrichment	Bonferroni	Benjamini	FDR
REACTOME_PATHWAY	REACT_604:Hemostasis	4.48243e-06	P04196, P02751, P06239, P04114, Q07021, P35609, P12814, P07737, P56945, P27986, P62993, P62879, P62328, P01009, P06241, P07996, P08962, P00734, P07948, P02679, P02787, P05556, P02675, P21333, P62937, P20701, P04275, P02647	2.59531	0.000237541	0.000237541	0.00437319
REACTOME_PATHWAY	REACT_13552:Integrin cell surface interactions	1.20312e-05	P02679, P02751, P05556, Q9Y6N6, P02675, P08572, P16144, P35555, P55268, P56945, P62993, O15230, P20701, P04275, P07996	4.03371	0.000637455	0.000318778	0.0117376
REACTOME_PATHWAY	REACT_578:Apoptosis	0.00190411	P52294, O14763, P25789, Q13464, P35222, Q13813, P61289, P28062, P28070, Q07812, O14818, P20700, P08670, P60900, P28065	2.5328	0.0960796	0.0331108	1.84233
REACTOME_PATHWAY	REACT_11045:Signaling by Wnt	0.00586673	P25789, P28062, P61289, P28070, O14818, O15169, P60900, P28065, P35222	3.21375	0.26791	0.0750014	5.57906
REACTOME_PATHWAY	REACT_6185:HIV Infection	0.00866101	P52294, P06239, P25789, P21675, P05141, P62937, P61769, P37198, P61289, P28062, P28070, O14818, P08631, P06241, P60900, P28065, Q96CW1	2.01247	0.369368	0.0880833	8.13676
REACTOME_PATHWAY	REACT_152:Cell Cycle, Mitotic	0.00957874	Q8TEP8, P25789, Q86SQ7, O14777, Q96MT8, Q15154, O94986, Q03188, P68371, Q9UJX2, P07900, P53350, P61289, P28062, P28070, Q9BV73, P62258, O14818, Q14683, Q86XR8, P38936, P60900, O95613, P28065	1.71964	0.399577	0.0815061	8.96312
REACTOME_PATHWAY	REACT_1538:Cell Cycle Checkpoints	0.0121148	Q13315, P04637, P25789, P28062, P61289, P28070, O14818, P38936, O96017, P60900, P28065, Q9UJX2	2.33379	0.475864	0.0881559	11.2121
REACTOME_PATHWAY	REACT_9035:APC/C:Cdh1-mediated degradation of Skp2	0.0197183	P25789, P28062, P61289, P28070, O14818, P60900, P28065, Q9UJX2	2.85666	0.651986	0.123606	17.6592
REACTOME_PATHWAY	REACT_18266:Axon guidance	0.0225465	P04049, P62993, P08572, P06241, Q5XG79, O14594, Q13813	3.11172	0.701397	0.125667	19.9479
REACTOME_PATHWAY	REACT_16888:Signaling by PDGF	0.0250683	P04049, P56945, P27986, P42224, P62993, P08572, P07996, P40763	2.72276	0.739605	0.125896	21.9403
REACTOME_PATHWAY	REACT_6850:Cdc20:Phospho-APC/C mediated degradation of Cyclin A	0.0291435	P25789, P28062, P61289, P28070, O14818, P60900, P28065, Q9UJX2	2.64025	0.791447	0.132817	25.0661
REACTOME_PATHWAY	REACT_13635:Regulation of activated PAK-2p34 by proteasome mediated degradation	0.0479188	P25789, P28062, P61289, P28070, O14818, P60900	2.97028	0.925917	0.194974	38.0655
REACTOME_PATHWAY	REACT_602:Metabolism of lipids and lipoproteins	0.07816	P04114, P02649, Q15126, P22307, P53396, P49327, P04035, P02652, P02647, O75907, Q8WTV0, Q15125	1.74256	0.986611	0.282365	54.7976

## Sheet: KEGG
Category	Term	PValue	Genes	Fold Enrichment	Bonferroni	Benjamini	FDR
KEGG_PATHWAY	hsa04510:Focal adhesion	3.59104e-07	P02751, Q9Y6N6, P05556, O96013, P08572, P51636, Q13464, P16144, P60709, P21333, P55268, P35222, P35609, P12814, P04049, P05412, P27986, P56945, Q9HBI0, O15230, P62993, P06241, P04275, P07996	3.39198	4.4887e-05	4.4887e-05	0.000415271
KEGG_PATHWAY	hsa05200:Pathways in cancer	5.93621e-05	P27540, P02751, P36897, P42224, O15169, P35222, P27986, P07900, P62993, P38936, Q9NQB0, P19793, P23458, Q9Y6N6, P05556, P08572, P35354, P55268, P04637, P04049, P05412, P37173, O15230, P08238, Q07812, P40763, P29590	2.33845	0.00739302	0.00370337	0.0686255
KEGG_PATHWAY	hsa04520:Adherens junction	0.000307393	P55196, P12814, P36897, P37173, Q9Y2D8, P06241, P67870, P60709, P35222, P35609, Q9NQB0	4.05826	0.0377009	0.0127283	0.354896
KEGG_PATHWAY	hsa05210:Colorectal cancer	0.000625934	P04637, P04049, P05412, P36897, P27986, P37173, P62993, Q07812, O15169, P35222, Q9NQB0	3.72007	0.0752818	0.0155314	0.721449
KEGG_PATHWAY	hsa04610:Complement and coagulation cascades	0.000596494	P02679, P05546, P02675, P08603, P01009, P04275, P01024, P00734, P0C0L4, P10643	4.11708	0.0718704	0.0184732	0.687623
KEGG_PATHWAY	hsa04810:Regulation of actin cytoskeleton	0.00126321	P02751, P05556, O96013, Q13464, P60709, P16144, P35609, P12814, P07737, P04049, P27986, P56945, Q15052, Q7Z406, P62328, P20701, P00734, Q13576	2.37833	0.146152	0.0259899	1.45109
KEGG_PATHWAY	hsa04512:ECM-receptor interaction	0.00247012	P02751, Q9Y6N6, P05556, O15230, P08572, P04275, P16144, Q5XG79, P55268, P07996	3.38188	0.265927	0.0379062	2.81949
KEGG_PATHWAY	hsa05222:Small cell lung cancer	0.00247012	P04637, P02751, P27986, P19793, Q9Y6N6, P05556, O15230, P08572, P35354, P55268	3.38188	0.265927	0.0379062	2.81949
KEGG_PATHWAY	hsa04115:p53 signaling pathway	0.00236321	Q13315, P04637, O14763, Q07812, Q8IUQ4, P38936, O96017, P07996, P27701	3.75986	0.256027	0.04137	2.69898
KEGG_PATHWAY	hsa05215:Prostate cancer	0.00367217	P04637, P04049, P07900, P27986, P62993, P08238, O43889, P38936, P35222, Q9NQB0	3.19189	0.368632	0.0449452	4.16513
KEGG_PATHWAY	hsa05212:Pancreatic cancer	0.00339805	P04637, P04049, P36897, P27986, P23458, P37173, P42224, Q15052, P40763	3.55098	0.346544	0.0461755	3.85978
KEGG_PATHWAY	hsa03050:Proteasome	0.00550625	P25789, P28062, P61289, P28070, O14818, P60900, P28065	4.23095	0.498516	0.0608161	6.18551
KEGG_PATHWAY	hsa04670:Leukocyte transendothelial migration	0.00793028	P55196, P12814, P56945, P27986, P14209, P05556, P20701, Q13464, P60709, P35222, P35609	2.64819	0.630364	0.0795903	8.79608
KEGG_PATHWAY	hsa05213:Endometrial cancer	0.00904154	P04637, P04049, P27986, P62993, O15169, P35222, Q9NQB0	3.82413	0.678685	0.0836284	9.97052
KEGG_PATHWAY	hsa05130:Pathogenic Escherichia coli infection	0.0139644	P05556, Q13464, P06241, P60709, P35222, P19338, P68371	3.48868	0.827584	0.117998	15.0089
KEGG_PATHWAY	hsa05412:Arrhythmogenic right ventricular cardiomyopathy (ARVC)	0.0163684	P12814, P05556, P16144, P60709, P17661, P35222, P35609, Q9NQB0	2.9903	0.872926	0.128494	17.3746
KEGG_PATHWAY	hsa05020:Prion diseases	0.0326216	P46531, P08107, Q07812, P06241, P10643	4.05826	0.984168	0.228259	31.8549
KEGG_PATHWAY	hsa05220:Chronic myeloid leukemia	0.0464562	P04637, P04049, P36897, P27986, P37173, P62993, P38936	2.6514	0.997384	0.295156	42.311
KEGG_PATHWAY	hsa05221:Acute myeloid leukemia	0.0511321	P04049, P27986, P62993, P40763, P29590, Q9NQB0	2.93874	0.998585	0.305445	45.499
KEGG_PATHWAY	hsa04722:Neurotrophin signaling pathway	0.0680516	P04637, P04049, P05412, P27986, Q9Y5V3, P62993, Q07812, P62258, Q13164	2.06186	0.999851	0.371029	55.7366
KEGG_PATHWAY	hsa05216:Thyroid cancer	0.0792463	P04637, P19793, P35222, Q9NQB0	3.91832	0.999967	0.403107	61.5097
KEGG_PATHWAY	hsa05211:Renal cell carcinoma	0.0972705	P27540, P04049, P05412, P27986, P62993, O96013	2.43496	0.999997	0.440904	69.3759
KEGG_PATHWAY	hsa04530:Tight junction	0.0965368	P55196, Q9P0L0, P12814, Q7Z406, P67870, P60709, P35222, P35609, Q13813	1.90799	0.999997	0.453535	69.0868

## Sheet: Biocarta
Category	Term	PValue	Genes	Fold Enrichment	Bonferroni	Benjamini	FDR
BIOCARTA	h_p53hypoxiaPathway:Hypoxia and p53 in the Cardiovascular system	0.000431795	Q13315, P04637, Q14192, P07900, P08107, Q07812, P21675, P38936	5.26374	0.0827523	0.0827523	0.539865
BIOCARTA	h_integrinPathway:Integrin Signaling Pathway	0.00400113	P04049, P05412, P56945, P62993, P05556, Q13464, P06241, P35609	3.71558	0.551493	0.330294	4.9009
BIOCARTA	h_egfPathway:EGF Signaling Pathway	0.00424288	P04049, P05412, P27986, P23458, P42224, P62993, P40763	4.25148	0.572748	0.246827	5.1898
BIOCARTA	h_pdgfPathway:PDGF Signaling Pathway	0.0168632	P04049, P05412, P23458, P42224, P62993, P40763	3.78989	0.966674	0.572735	19.1978
BIOCARTA	h_atmPathway:ATM Signaling Pathway	0.0321655	Q13315, P04637, P05412, P38936, O96017	3.9478	0.998554	0.729577	33.6209
BIOCARTA	h_TPOPathway:TPO Signaling Pathway	0.0321655	P04049, P05412, P42224, P62993, P40763	3.9478	0.998554	0.729577	33.6209
BIOCARTA	h_il2Pathway:IL 2 signaling pathway	0.0378795	P04049, P05412, P06239, P23458, P62993	3.75981	0.999558	0.723953	38.3691
BIOCARTA	h_ecmPathway:Erk and PI-3 Kinase Are Necessary for Collagen Binding in Corneal Epithelia	0.0441409	P07737, P04049, P05556, Q13464, P06241	3.58891	0.99988	0.724688	43.2119
BIOCARTA	h_g2Pathway:Cell Cycle: G2/M Checkpoint	0.0509504	Q13315, P04637, P53350, P38936, O96017	3.43287	0.999971	0.729465	48.0793
BIOCARTA	h_tsp1Pathway:TSP-1 Induced Apoptosis in Microvascular Endothelial Cell	0.0662981	P05412, P06241, P07996	6.76766	0.999999	0.782248	57.6755
BIOCARTA	h_LairPathway:Cells and Molecules involved in local acute inflammatory response	0.0735196	P05556, P20701, P01024, P10643	3.9478	1	0.782867	61.6004
BIOCARTA	h_agrPathway:Agrin in Postsynaptic Differentiation	0.0835644	P05412, P05556, Q15052, Q5XG79, P46939	2.9243	1	0.795382	66.5045
BIOCARTA	h_p53Pathway:p53 Signaling Pathway	0.0853636	Q13315, P04637, Q07812, P38936	3.71558	1	0.773983	67.3194

## Sheet: Prosite
Category	Term	PValue	Genes	Fold Enrichment	Bonferroni	Benjamini	FDR
PROSITE	PS01187:EGF_CA	4.54805e-14	Q9UHF1, Q9Y219, P14543, Q14112, Q8N2S1, Q9UBX5, P23142, Q7Z7M0, P35555, Q99435, Q92832, O94813, O95967, P46531, Q4LDE5, Q12805, O75093, O75094, O75095, O14594, Q75N90, P98095, P13611	8.05659	2.60825e-11	2.60825e-11	6.68021e-11
PROSITE	PS01187:Calcium-binding EGF-like domain signature.	5.07666e-14	Q9UHF1, P14543, Q14112, Q8N2S1, Q9UBX5, P23142, Q7Z7M0, P35555, Q99435, Q92832, O94813, O95967, P46531, Q4LDE5, O75093, O75094, O75095, O14594, Q75N90, P98095, P13611	9.17114	2.90724e-11	1.45362e-11	7.44627e-11
PROSITE	PS00010:ASX_HYDROXYL	5.71995e-14	Q9UHF1, Q9Y219, Q9HCU4, P14543, Q14112, Q8N2S1, Q9UBX5, P23142, Q7Z7M0, P35555, Q99435, Q92832, O94813, O95967, P46531, Q4LDE5, Q12805, O75093, O75095, O14594, Q75N90, P98095, P13611	7.97353	3.27621e-11	1.09207e-11	8.39107e-11
PROSITE	PS00010:Aspartic acid and asparagine hydroxylation site.	1.45123e-13	Q9UHF1, Q9HCU4, P14543, Q14112, Q8N2S1, Q9UBX5, P23142, Q7Z7M0, P35555, Q99435, Q92832, O94813, O95967, P46531, Q4LDE5, O75093, O75095, O14594, Q75N90, P98095, P13611	8.71824	8.31458e-11	2.07865e-11	2.12963e-10
PROSITE	PS00022:EGF_1	2.90216e-13	Q9UHF1, P02751, Q7Z7M0, Q99435, O94813, P10643, P46531, Q4LDE5, Q96H12, O14594, P07996, P98095, Q9Y219, Q9HCU4, Q9Y6N6, P05556, P14543, Q14112, Q96GW7, Q9NY15, P35354, Q8N2S1, Q9UBX5, P16144, Q5XG79, P23142, P55268, P35555, Q92832, O95967, O15230, O75093, Q12805, O75094, O75095, Q75N90, P13611	4.26102	1.66292e-10	3.32583e-11	4.25915e-10
PROSITE	PS01186:EGF_2	2.90216e-13	Q9UHF1, P02751, Q7Z7M0, Q99435, O94813, P10643, P46531, Q4LDE5, Q96H12, O14594, P07996, P98095, Q9Y219, Q9HCU4, Q9Y6N6, P05556, P14543, Q14112, Q96GW7, Q9NY15, P35354, Q8N2S1, Q9UBX5, P16144, Q5XG79, P23142, P55268, P35555, Q92832, O95967, O15230, O75093, Q12805, O75094, O75095, Q75N90, P13611	4.26102	1.66292e-10	3.32583e-11	4.25915e-10
PROSITE	PS01186:EGF-like domain signature 2.	1.01811e-11	Q9UHF1, Q7Z7M0, Q99435, O94813, P10643, P46531, Q4LDE5, Q96H12, P07996, O14594, P98095, Q9HCU4, Q9Y6N6, P14543, Q96GW7, Q14112, Q9NY15, Q8N2S1, P35354, Q9UBX5, P16144, Q5XG79, P23142, P35555, Q92832, O95967, O75093, O75094, O75095, Q75N90, P13611	4.47405	5.83376e-09	9.72293e-10	1.49419e-08
PROSITE	PS50026:EGF-like domain profile.	1.74748e-11	Q9UHF1, Q7Z7M0, Q99435, O94813, P10643, P46531, Q4LDE5, Q96H12, P07996, O14594, P98095, Q9HCU4, P14543, Q96GW7, Q14112, Q9NY15, Q8N2S1, P35354, Q9UBX5, Q5XG79, P23142, P35555, Q92832, O95967, O75093, O75094, O75095, Q75N90, P13611	4.68845	1.00131e-08	1.43044e-09	2.56463e-08
PROSITE	PS00022:EGF-like domain signature 1.	6.37901e-10	Q9UHF1, P02751, Q7Z7M0, Q99435, O94813, P10643, P46531, Q4LDE5, Q96H12, P07996, O14594, Q9HCU4, Q9Y6N6, Q96GW7, P14543, P05556, Q9NY15, Q8N2S1, P35354, P16144, Q5XG79, P35555, Q92832, O15230, O75093, O75094, O75095, P13611	4.16624	3.65517e-07	4.56897e-08	9.36194e-07
PROSITE	PS50002:Src homology 3 (SH3) domain profile.	8.86389e-06	Q8WUF5, O94875, O75962, O00499, Q16584, Q5VST9, A7KAX9, Q13813, P27986, P56945, Q13625, P62993, Q15052, Q8N2Y8, P08631, P57075, O95153, O60504, P07948	3.47241	0.00506615	0.000564178	0.013008
PROSITE	PS01248:EGF_LAM_1	0.000178836	Q9HCU4, Q9Y6N6, O15230, Q9NY15, Q5XG79, Q7Z7M0, O75095, P55268	6.56146	0.0974057	0.0101959	0.262142
PROSITE	PS50923:Sushi/CCP/SCR domain profile.	0.000429538	O60687, Q96GW7, Q4LDE5, P02749, P08603, O14594, P13611, P10643	5.72383	0.218217	0.0221313	0.628549
PROSITE	PS00020:ACTININ_2	0.000482358	P12814, Q8NF91, Q03001, P21333, P46939, P35609	8.77239	0.241534	0.0227748	0.705586
PROSITE	PS00019:Actinin-type actin-binding domain signature 1.	0.000482358	P12814, Q8NF91, Q03001, P21333, P46939, P35609	8.77239	0.241534	0.0227748	0.705586
PROSITE	PS00019:ACTININ_1	0.000482358	P12814, Q8NF91, Q03001, P21333, P46939, P35609	8.77239	0.241534	0.0227748	0.705586
PROSITE	PS00020:Actinin-type actin-binding domain signature 2.	0.000482358	P12814, Q8NF91, Q03001, P21333, P46939, P35609	8.77239	0.241534	0.0227748	0.705586
PROSITE	PS50027:Laminin-type EGF-like (LE) domain profile.	0.000725407	Q9HCU4, Q9Y6N6, O15230, Q9NY15, Q5XG79, Q7Z7M0	8.0706	0.340194	0.0314792	1.05935
PROSITE	PS01177:ANAPHYLATOXIN_1	0.000827845	P23142, P01024, P0C0L4, P98095	19.2157	0.377836	0.0333285	1.20811
PROSITE	PS01248:Laminin-type EGF-like (LE) domain signature.	0.00104991	Q9HCU4, Q9Y6N6, O15230, Q9NY15, Q5XG79, Q7Z7M0	7.47278	0.452239	0.0393333	1.52985
PROSITE	PS01185:C-terminal cystine knot signature.	0.00167205	P29279, P04275, O75093, O75094, O94813	9.34097	0.61668	0.0581699	2.42606
PROSITE	PS50021:Calponin homology domain profile.	0.00252144	P12814, Q8NF91, Q15052, Q03001, P21333, P46939, P35609, Q13576	4.27016	0.764633	0.0815746	3.63737
PROSITE	PS50963:Link domain profile.	0.00265596	Q96GW7, Q9NY15, O14594, P13611	13.451	0.782137	0.0811758	3.82792
PROSITE	PS01241:Link domain signature.	0.00265596	Q96GW7, Q9NY15, O14594, P13611	13.451	0.782137	0.0811758	3.82792
PROSITE	PS00484:Thyroglobulin type-1 repeat signature.	0.00465916	Q14112, P14543, P09758, Q9BQ16	11.2092	0.931158	0.131371	6.62424
PROSITE	PS00854:PROTEASOME_B	0.00465916	P25789, P28062, P28070, P28065	11.2092	0.931158	0.131371	6.62424
PROSITE	PS51162:Thyroglobulin type-1 domain profile.	0.00465916	Q14112, P14543, P09758, Q9BQ16	11.2092	0.931158	0.131371	6.62424
PROSITE	PS50870:Arfaptin homology (AH) domain profile.	0.00505631	Q9NRD5, P53365, P53367	25.2206	0.94523	0.135177	7.16954
PROSITE	PS01225:C-terminal cystine knot domain profile.	0.0058704	P29279, P04275, O75093, O75094, O94813	6.7255	0.965736	0.14841	8.27808
PROSITE	PS01185:CTCK_1	0.0058704	P29279, P04275, O75093, O75094, O94813	6.7255	0.965736	0.14841	8.27808
PROSITE	PS01208:VWFC_1	0.00624922	Q9Y219, P29279, P04275, Q99435, P07996, Q92832	5.04413	0.972458	0.150642	8.78969
PROSITE	PS01241:LINK_1	0.00737718	Q96GW7, Q9NY15, O14594, P13611	9.60786	0.985633	0.168455	10.2974
PROSITE	PS01178:Anaphylatoxin domain profile.	0.00826233	P01024, P0C0L4, P98095	20.1765	0.991383	0.179698	11.4642
PROSITE	PS01177:Anaphylatoxin domain signature.	0.00826233	P01024, P0C0L4, P98095	20.1765	0.991383	0.179698	11.4642
PROSITE	PS51364:TGF-beta binding (TB) domain profile.	0.0121517	Q8N2S1, P35555, Q75N90	16.8138	0.999093	0.244384	16.4255
PROSITE	PS00039:DEAD-box subfamily ATP-dependent helicases signature.	0.0127061	O15523, Q9GZR7, O00571, Q14240, P17844	5.42379	0.999343	0.245589	17.1113
PROSITE	PS00484:THYROGLOBULIN_1_1	0.0129052	Q14112, P14543, P09758, Q9BQ16	7.91235	0.999414	0.240929	17.3563
PROSITE	PS01208:VWFC domain signature.	0.0141899	P29279, P04275, Q99435, P07996, Q92832	5.2543	0.999722	0.253579	18.9209
PROSITE	PS00039:DEAD_ATP_HELICASE	0.0141899	O15523, Q9GZR7, O00571, Q14240, P17844	5.2543	0.999722	0.253579	18.9209
PROSITE	PS50025:Laminin G domain profile.	0.0141899	Q9HCU4, O75093, Q5XG79, O75094, O94813	5.2543	0.999722	0.253579	18.9209
PROSITE	PS50184:VWFC domain profile.	0.0141899	P29279, P04275, Q99435, P07996, Q92832	5.2543	0.999722	0.253579	18.9209
PROSITE	PS50003:PH domain profile.	0.0170272	Q8N1W1, O95248, Q58EX7, O75962, Q13464, Q5VT25, Q96P48, Q5VST9, Q9UPU7, Q969R2, Q9H2D6, Q86UW7, Q15052, Q9UJF2, Q9ULU8	2.01765	0.999947	0.287753	22.2791
PROSITE	PS00388:PROTEASOME_A	0.0218097	P25789, O14818, P60900	12.6103	0.999997	0.343725	27.6479
PROSITE	PS51195:DEAD-box RNA helicase Q motif profile.	0.0232294	O15523, Q9GZR7, O00571, Q14240, P17844	4.54426	0.999999	0.35237	29.1738
PROSITE	PS50020:WW/rsp5/WWP domain profile.	0.0300096	Q9HAU4, Q14CM0, P46939, Q13576, Q9BYW2	4.20344	1	0.420498	36.0564
PROSITE	PS01159:WW/rsp5/WWP domain signature.	0.0325027	Q9HAU4, Q14CM0, P46939, Q13576, Q9BYW2	4.10092	1	0.436586	38.4265
PROSITE	PS50001:Src homology 2 (SH2) domain profile.	0.0348466	P27986, P07332, P42224, P62993, P08631, P06241, P40763, P07948	2.58673	1	0.449949	40.5799
PROSITE	PS00854:Proteasome B-type subunits signature.	0.0404055	P28062, P28070, P28065	9.17114	1	0.490961	45.4095
PROSITE	PS51406:Fibrinogen C-terminal domain profile.	0.0534898	P02679, P02675, Q08830, Q15485	4.63828	1	0.583136	55.3716
PROSITE	PS00514:Fibrinogen C-terminal domain signature.	0.0534898	P02679, P02675, Q08830, Q15485	4.63828	1	0.583136	55.3716
PROSITE	PS50234:VWFA domain profile.	0.0535863	P05556, Q4LDE5, P20701, Q9UKK3, P04275, P16144	2.92413	1	0.573834	55.4384
PROSITE	PS00226:Intermediate filaments signature.	0.0563717	P20700, P07197, P08670, P14136, P07196, P17661	2.88236	1	0.583106	57.3248
PROSITE	PS51192:Superfamilies 1 and 2 helicase ATP-binding type-1 domain profile.	0.0578929	O15523, Q9GZR7, O00571, Q14240, P17844, Q6ZRS2, Q9H6S0	2.5311	1	0.583636	58.3235
PROSITE	PS50006:Forkhead-associated (FHA) domain profile.	0.0581748	P55196, Q14BN4, O96017, Q8N302	4.48367	1	0.576235	58.5061
PROSITE	PS00205:Transferrin-like domain signature 1.	0.0584279	P02787, P02788	33.6275	1	0.56889	58.6695
PROSITE	PS00206:Transferrin-like domain signature 2.	0.0584279	P02787, P02788	33.6275	1	0.56889	58.6695
PROSITE	PS00207:Transferrin-like domain signature 3.	0.0584279	P02787, P02788	33.6275	1	0.56889	58.6695
PROSITE	PS51194:Superfamilies 1 and 2 helicase C-terminal domain profile.	0.0603745	O15523, Q9GZR7, O00571, Q14240, P17844, Q6ZRS2, Q9H6S0	2.50418	1	0.572412	59.9059
PROSITE	PS00226:IF	0.0621881	P20700, P07197, P08670, P14136, P07196, P17661	2.80229	1	0.574963	61.0268
PROSITE	PS00107:Protein kinases ATP-binding region signature.	0.0647278	Q9UHD2, P36897, P07332, O96013, O75962, Q13464, Q5VT25, P19525, Q14164, O96017, Q16584, Q5VST9, P04049, P53350, P08631, P06241, P07948	1.60581	1	0.581656	62.5474
PROSITE	PS00514:FIBRIN_AG_C_DOMAIN	0.0681005	P02679, P02675, Q08830, Q15485	4.20344	1	0.592651	64.4814
PROSITE	PS00036:BZIP_BASIC	0.0716012	P05412, Q16621, Q99941, O43889, P18850	3.17241	1	0.603645	66.3901
PROSITE	PS01159:WW_DOMAIN_1	0.0716012	Q9HAU4, Q14CM0, P46939, Q13576, Q9BYW2	3.17241	1	0.603645	66.3901
PROSITE	PS00107:PROTEIN_KINASE_ATP	0.0747392	Q9UHD2, P36897, P06239, P07332, P23458, O96013, O75962, Q13464, P19525, Q5VT25, Q14164, O96017, Q13164, Q16584, P04049, P53350, Q16644, P08631, P06241, P07948	1.50123	1	0.612109	68.0193
PROSITE	PS00615:C-type lectin domain signature.	0.0747982	Q96GW7, Q5VT25, Q9H2X3, Q9NNX6, O14594, P13611	2.6548	1	0.604681	68.0492
PROSITE	PS50831:SoHo domain profile.	0.0863525	O94875, O60504	22.4183	1	0.652183	73.4306
PROSITE	PS50825:HYR domain profile.	0.0863525	O60687, Q4LDE5	22.4183	1	0.652183	73.4306
PROSITE	PS00206:TRANSFERRIN_2	0.0863525	P02787, P02788	22.4183	1	0.652183	73.4306
PROSITE	PS50993:Nidogen G2 beta-barrel domain profile.	0.0863525	Q14112, P14543	22.4183	1	0.652183	73.4306
PROSITE	PS00207:TRANSFERRIN_3	0.0863525	P02787, P02788	22.4183	1	0.652183	73.4306
PROSITE	PS00205:TRANSFERRIN_1	0.0863525	P02787, P02788	22.4183	1	0.652183	73.4306
PROSITE	PS50106:PDZ domain profile.	0.0890036	P55196, Q96NW7, Q9NRD5, Q09666, Q96HC4, Q14CM0, Q9UMS6, Q9H8Y8	2.08543	1	0.656394	74.5399
PROSITE	PS00741:Dbl homology (DH) domain signature.	0.0927395	Q8N1W1, Q58EX7, Q15052, O75962, Q5VST9	2.89892	1	0.664952	76.03
PROSITE	PS50137:Double stranded RNA-binding domain (dsRBD) profile.	0.0982294	Q96SI9, P19525, Q9UPY3	5.60458	1	0.679968	78.0728

## Sheet: PFam
Category	Term	PValue	Genes	Fold Enrichment	Bonferroni	Benjamini	FDR
PFAM	PF07645:EGF_CA	9.52043e-12	Q9UHF1, Q9Y219, P14543, Q14112, Q8N2S1, Q9UBX5, P23142, Q7Z7M0, P35555, Q99435, Q92832, O95967, P46531, Q4LDE5, Q12805, O75095, Q75N90, P98095	8.92363	1.05391e-08	1.05391e-08	1.52368e-08
PFAM	PF00008:EGF	3.58607e-10	Q9Y219, Q9HCU4, Q96GW7, P14543, Q14112, Q9NY15, Q8N2S1, P35354, Q5XG79, P35555, O94813, P46531, Q4LDE5, Q96H12, O75093, O75094, O75095, O14594, P07996, Q75N90, P13611	5.90224	3.96978e-07	1.98489e-07	5.73928e-07
PFAM	PF00018:SH3_1	2.35343e-06	Q8WUF5, P06239, O94875, O75962, O00499, Q16584, A7KAX9, Q9NZM3, Q13813, P27986, P56945, Q13625, P62993, Q15052, Q8N2Y8, P08631, P06241, P57075, O95153, O60504, P07948	3.51918	0.00260186	0.000868041	0.00376645
PFAM	PF04732:Intermediate filament head	8.64577e-06	P07197, P08670, P14136, P07196, P17661	29.7454	0.00952526	0.00238987	0.0138361
PFAM	PF00435:Spectrin	1.75283e-05	P12814, Q8NF91, O75962, Q03001, P46939, P35609, Q13813	11.8982	0.0192169	0.00387328	0.0280492
PFAM	PF04732:Filament_head	1.9727e-05	P07197, P08670, P14136, P07196, P17661	25.4961	0.0216013	0.00363305	0.0315671
PFAM	PF07974:EGF_2	5.97022e-05	Q9UHF1, P05556, Q4LDE5, Q9NY15, P16144, Q7Z7M0, O75095, P35555, Q99435, Q92832	5.66579	0.0639555	0.00939732	0.0955067
PFAM	PF00018:SH3 domain	9.76871e-05	Q8WUF5, O75962, O00499, Q16584, A7KAX9, Q13813, P27986, P56945, Q13625, Q15052, P08631, P57075, P07948	4.00025	0.102502	0.0134272	0.156227
PFAM	PF07974:EGF-like domain	0.000106783	Q9UHF1, Q4LDE5, Q9NY15, P16144, O75095, P35555, Q99435, Q92832	7.1389	0.111495	0.0130491	0.170763
PFAM	PF00053:Laminin_EGF	0.000125703	Q9HCU4, Q9Y6N6, O15230, Q9NY15, Q5XG79, Q7Z7M0, O75095, P55268	6.96478	0.129913	0.0138198	0.20099
PFAM	PF00227:Proteasome	0.000140353	P25789, P28062, P28070, O14818, P60900, P28065	11.2719	0.143912	0.0140263	0.22439
PFAM	PF00084:Sushi domain	0.000147255	O60687, Q96GW7, Q4LDE5, P02749, P08603, O14594, P13611, P10643	6.79895	0.150428	0.0134934	0.235412
PFAM	PF00053:Laminin EGF-like	0.000187624	Q9HCU4, Q9Y6N6, O15230, Q9NY15, Q5XG79, Q7Z7M0, O75095	8.06005	0.187565	0.0158514	0.299858
PFAM	PF01821:ANATO	0.000698409	P23142, P01024, P0C0L4, P98095	20.3969	0.538562	0.0537453	1.11192
PFAM	PF00307:CH	0.000725223	P12814, Q9HBI0, Q8NF91, Q15052, Q03001, P21333, P46939, P35609, Q13576	4.58929	0.552067	0.0521328	1.15438
PFAM	PF00084:Sushi	0.000904577	O60687, Q96GW7, Q4LDE5, P02749, P08603, O14594, P13611, P10643	5.09922	0.632789	0.0606938	1.43793
PFAM	PF00307:Calponin homology	0.00166198	P12814, Q8NF91, Q15052, Q03001, P21333, P46939, P35609, Q13576	4.60574	0.841395	0.102654	2.62698
PFAM	PF00008:EGF-like domain	0.00286696	Q14112, Q96GW7, Q9NY15, Q96H12, P35354, P35555, P07996	4.89925	0.958343	0.161861	4.491
PFAM	PF00017:SH2	0.00393212	P27986, P06239, P07332, P23458, P42224, P62993, P08631, P06241, P40763, P07948	3.21572	0.98724	0.205108	6.11083
PFAM	PF01442:Apolipoprotein A1/A4/E domain	0.00450668	Q6Q788, P02649, P02647	26.7709	0.993263	0.221206	6.97385
PFAM	PF01442:Apolipoprotein	0.00450668	Q6Q788, P02649, P02647	26.7709	0.993263	0.221206	6.97385
PFAM	PF06456:Arfaptin-like domain	0.00450668	Q9NRD5, P53365, P53367	26.7709	0.993263	0.221206	6.97385
PFAM	PF00093:VWC	0.00490611	Q9Y219, P29279, P04275, Q99435, P07996, Q92832	5.35418	0.99568	0.228376	7.56942
PFAM	PF00227:Proteasome A-type and B-type	0.00503564	P28062, P28070, O14818, P28065	10.9829	0.99626	0.224327	7.7618
PFAM	PF02210:Laminin_G_2	0.00606052	Q9HCU4, O15230, O75093, O75094, Q99435, O94813	5.09922	0.998805	0.253667	9.27071
PFAM	PF00193:Xlink	0.00627737	Q96GW7, Q9NY15, O14594, P13611	10.1984	0.999061	0.252078	9.58698
PFAM	PF06456:Arfaptin	0.0073724	Q9NRD5, P53365, P53367	21.4167	0.999723	0.279391	11.1684
PFAM	PF01821:Anaphylotoxin-like domain	0.0073724	P23142, P01024, P0C0L4	21.4167	0.999723	0.279391	11.1684
PFAM	PF00170:bZIP_1	0.010431	P05412, Q16621, Q99941, O43889, P18850	5.75718	0.999991	0.360106	15.4493
PFAM	PF08726:efhand_Ca_insen	0.0108548	P12814, P35609, Q13813	17.8473	0.999994	0.360764	16.027
PFAM	PF08726:Ca2+ insensitive EF hand	0.0108548	P12814, P35609, Q13813	17.8473	0.999994	0.360764	16.027
PFAM	PF00086:Thyroglobulin_1	0.0110211	Q14112, P14543, P09758, Q9BQ16	8.39871	0.999995	0.354769	16.2526
PFAM	PF00169:PH	0.0115173	Q8N1W1, O95248, Q58EX7, O75962, Q13464, Q5VT25, Q96P48, Q5VST9, Q9H2D6, Q9NZM3, Q9UPU7, Q969R2, Q86UW7, Q15052, Q9UJF2, Q9ULU8	2.06178	0.999997	0.357376	16.9226
PFAM	PF02210:Laminin G domain	0.0129553	O75093, O75094, Q99435, O94813	7.93211	0.999999	0.381943	18.8359
PFAM	PF00683:TB	0.0149174	Q8N2S1, P35555, Q75N90	15.2976	1	0.41533	21.3798
PFAM	PF00038:Filament	0.0152666	P20700, P07197, P08670, P14136, Q15485, P07196, P17661	3.4703	1	0.412689	21.8247
PFAM	PF10584:Proteasome_A_N	0.0195251	P25789, O14818, P60900	13.3854	1	0.483901	27.0632
PFAM	PF00086:Thyroglobulin type-1 repeat	0.0195251	P14543, P09758, Q9BQ16	13.3854	1	0.483901	27.0632
PFAM	PF00035:dsrm	0.0225205	Q96SI9, P19525, P55265, Q9UPY3	6.48991	1	0.52366	30.5489
PFAM	PF00170:bZIP transcription factor	0.0253738	Q16621, Q99941, O43889, P18850	6.20774	1	0.556427	33.7233
PFAM	PF00147:Fibrinogen beta and gamma chains, C-terminal globular domain	0.0253738	P02679, P02675, Q08830, Q15485	6.20774	1	0.556427	33.7233
PFAM	PF00270:DEAD	0.0276124	O15523, Q9GZR7, O00571, Q14240, P17844, Q9UPY3	3.51093	1	0.577271	36.1181
PFAM	PF00271:Helicase_C	0.0291488	O15523, Q9GZR7, O00571, Q14240, P17844, Q9UPY3, Q6ZRS2, Q9H6S0	2.69392	1	0.587313	37.7146
PFAM	PF00017:SH2 domain	0.0333031	P07332, P42224, P62993, P08631, P06241, P40763, P07948	2.90537	1	0.627193	41.8458
PFAM	PF00271:Helicase conserved C-terminal domain	0.0384361	O15523, Q9GZR7, O00571, Q14240, P17844, Q6ZRS2, Q9H6S0	2.80743	1	0.671269	46.5957
PFAM	PF00498:FHA domain	0.038625	P55196, Q14BN4, O96017, Q8N302	5.28807	1	0.66383	46.7633
PFAM	PF00038:Intermediate filament protein	0.0413884	P20700, P07197, P08670, P14136, P07196, P17661	3.14952	1	0.680587	49.1603
PFAM	PF00621:RhoGEF	0.043641	Q8N1W1, Q58EX7, Q15052, O75962, Q5VST9, Q9NZM3	3.10387	1	0.691523	51.039
PFAM	PF00498:FHA	0.0504485	P55196, Q14BN4, O96017, Q8N302	4.75927	1	0.736225	56.3284
PFAM	PF02518:HATPase_c	0.0504485	P07900, P08238, O14874, Q8TE76	4.75927	1	0.736225	56.3284
PFAM	PF00147:Fibrinogen_C	0.0591918	P02679, P02675, Q08830, Q15485	4.46181	1	0.784567	62.3381
PFAM	PF00397:WW	0.0603811	Q9HAU4, Q14CM0, P46939, Q13576, Q9BYW2	3.36741	1	0.783921	63.0929
PFAM	PF01759:UNC-6/NTR/C345C module	0.0644022	P01024, Q6FHJ7, P0C0L4	7.1389	1	0.798509	65.5412
PFAM	PF00641:Zn-finger in Ran binding protein and others	0.0644022	Q96EP0, Q9H0F6, P98175	7.1389	1	0.798509	65.5412
PFAM	PF00270:DEAD/DEAH box helicase	0.0673956	O15523, Q9GZR7, O00571, Q14240, P17844	3.24496	1	0.806679	67.2639
PFAM	PF00092:VWA	0.0701546	P05556, Q4LDE5, P20701, Q9UKK3, P04275, P16144	2.71098	1	0.813158	68.7799
PFAM	PF00055:Laminin_N	0.0722789	Q9Y6N6, O15230, P55268	6.69272	1	0.816388	69.902
PFAM	PF01759:NTR	0.0804466	P01024, Q6FHJ7, P0C0L4	6.29903	1	0.843831	73.874
PFAM	PF02208:Sorbin homologous domain	0.0815443	O94875, O60504	23.7963	1	0.842186	74.3687
PFAM	PF07474:G2F domain	0.0815443	Q14112, P14543	23.7963	1	0.842186	74.3687
PFAM	PF02494:HYR	0.0815443	O60687, Q4LDE5	23.7963	1	0.842186	74.3687
PFAM	PF00210:Ferritin-like domain	0.0815443	P02792, P02794	23.7963	1	0.842186	74.3687
PFAM	PF07474:G2F	0.0815443	Q14112, P14543	23.7963	1	0.842186	74.3687
PFAM	PF02208:Sorb	0.0815443	O94875, O60504	23.7963	1	0.842186	74.3687
PFAM	PF00405:Transferrin	0.0815443	P02787, P02788	23.7963	1	0.842186	74.3687
PFAM	PF00595:PDZ domain	0.085155	P55196, Q96NW7, Q9NRD5, Q09666, Q96HC4, Q14CM0, Q9UMS6	2.29231	1	0.849634	75.9347
PFAM	PF00621:RhoGEF domain	0.0908181	Q8N1W1, Q58EX7, Q15052, O75962, Q5VST9	2.92578	1	0.863118	78.2112
PFAM	PF00169:PH domain	0.0975032	Q86UW7, O95248, Q58EX7, Q15052, Q9ULU8, Q13464, Q5VT25, Q5VST9, Q969R2, Q9H2D6	1.83049	1	0.877922	80.6386
PFAM	PF01753:MYND finger	0.0975668	O94966, O75398, Q9H7B4	5.63597	1	0.873344	80.6604

## Sheet: BLOCKS
Category	Term	PValue	Genes	Fold Enrichment	Bonferroni	Benjamini	FDR
BLOCKS	IPB001881:EGF-like calcium-binding	4.23563e-07	Q9UHF1, Q14112, Q8N2S1, Q9UBX5, P35555, Q99435, O95967, O94813, Q92832, P46531, O75093, O75094, P07996, P98095	5.98776	0.000140189	0.000140189	0.000574487
BLOCKS	IPB002017:Spectrin repeat	5.45787e-06	P12814, Q8NF91, O75962, Q03001, Q86VW0, P46939, P35609, Q13813	10.711	0.00180493	0.000902873	0.0074024
BLOCKS	IPB000152:Aspartic acid and asparagine hydroxylation site	1.67831e-05	Q9UHF1, P46531, Q14112, Q8N2S1, Q9UBX5, P23142, P35555, Q99435, Q92832, P98095, O95967	5.74129	0.00553986	0.00185004	0.022761
BLOCKS	IPB001589:Actin-binding, actinin-type	0.000716021	P12814, Q8NF91, Q03001, P21333, P46939, P35609	8.03327	0.211078	0.0575495	0.966801
BLOCKS	IPB001715:Calponin-like actin-binding	0.00185992	P12814, Q8NF91, Q15052, Q03001, P21333, P46939, P35609, Q13576	4.47916	0.460011	0.11595	2.4934
BLOCKS	IPB010504:Arfaptin-like	0.00600142	Q9NRD5, P53365, P53367	23.0957	0.86364	0.282567	7.84
BLOCKS	IPB001452:SH3 domain signature	0.016472	P56945, P62993, O94875, P08631, P57075, O00499, Q16584, A7KAX9, P07948	2.74404	0.995904	0.544053	20.1703
BLOCKS	IPB000629:ATP-dependent helicase, DEAD-box	0.0189568	O15523, Q9GZR7, O00571, Q14240, P17844	4.8116	0.998227	0.547002	22.8628
BLOCKS	IPB001791:Laminin G	0.0210369	Q9HCU4, O75094, Q99435, Q92832, O94813	4.66579	0.999122	0.542484	25.0518
BLOCKS	IPB002181:Fibrinogen, beta/gamma chain, C-terminal globular	0.0254586	P02679, P02675, Q08830, Q15485	6.15884	0.999804	0.574118	29.5152
BLOCKS	IPB001007:von Willebrand factor, type C	0.0307201	P29279, P04275, Q99435, P07996, Q92832	4.16138	0.999967	0.60894	34.5052
BLOCKS	IPB006210:Type I EGF	0.036398	Q96GW7, Q96H12, P35354, P23142, P07996	3.94798	0.999995	0.640379	39.5216
BLOCKS	IPB000253:Forkhead-associated (FHA)	0.0368452	P55196, Q14BN4, O96017, Q8N302	5.35552	0.999996	0.615516	39.9012
BLOCKS	IPB011616:bZIP transcription factor, bZIP_1	0.0368452	Q16621, Q99941, O43889, P18850	5.35552	0.999996	0.615516	39.9012
BLOCKS	IPB001664:Intermediate filament protein	0.0390177	P20700, P07197, P08670, P14136, P07196, P17661	3.18561	0.999998	0.60975	41.714
BLOCKS	IPB000243:Proteasome B-type subunit	0.0395838	P28062, P28070, P28065	9.23826	0.999998	0.589854	42.178
BLOCKS	IPB000716:Thyroglobulin type-1	0.0395838	Q14112, P09758, Q9BQ16	9.23826	0.999998	0.589854	42.178
BLOCKS	IPB001156:Transferrin	0.0636939	P02787, P02788	30.7942	1	0.743725	59.0426
BLOCKS	IPB000294:Vitamin K-dependent carboxylation/gamma-carboxyglutamic (GLA) domain	0.0643951	P22309, P22310, P08493, P00734	7.10636	1	0.726376	59.4566
BLOCKS	IPB000483:Cysteine-rich flanking region, C-terminal	0.073222	P02750, Q6UXK2, O75093, O75094, O94813	3.14227	1	0.752987	64.3481
BLOCKS	IPB006207:Cystine knot, C-terminal	0.0831218	P29279, O75094, O94813	6.15884	1	0.77949	69.1807
BLOCKS	IPB000436:Sushi domain/SCR domain/CCP module	0.0836286	Q96GW7, P02749, P08603, P10643	3.84928	1	0.764341	69.411
BLOCKS	IPB002353:Type II antifreeze protein signature	0.0930316	Q96GW7, Q9H2X3, Q9NNX6	5.77391	1	0.785429	73.4043
BLOCKS	IPB001519:Ferritin	0.0940078	P02792, P02794	20.5295	1	0.773578	73.7899
BLOCKS	IPB000074:Apolipoprotein A1/A4/E	0.0940078	P02649, P02647	20.5295	1	0.773578	73.7899
BLOCKS	IPB008331:Ferritin and Dps	0.0940078	P02792, P02794	20.5295	1	0.773578	73.7899
BLOCKS	IPB014034:Ferritin, central	0.0940078	P02792, P02794	20.5295	1	0.773578	73.7899
BLOCKS	IPB003127:Sorbin-like	0.0940078	O94875, O60504	20.5295	1	0.773578	73.7899
BLOCKS	IPB000980:SH2 domain signature	0.0952482	P27986, P07332, P62993, P08631, P06241, P07948	2.46354	1	0.763189	74.2725

## Sheet: SMART
Category	Term	PValue	Genes	Fold Enrichment	Bonferroni	Benjamini	FDR
SMART	SM00179:EGF_CA	1.44949e-13	Q9UHF1, Q9Y219, Q9HCU4, P14543, Q14112, Q8N2S1, Q9UBX5, P23142, Q7Z7M0, P35555, Q99435, Q92832, O94813, O95967, P46531, Q12805, O75093, O75094, O75095, O14594, Q75N90, P98095, P13611	7.5527	3.16089e-11	3.16089e-11	1.84297e-10
SMART	SM00181:EGF	1.53035e-10	Q9UHF1, Q7Z7M0, Q99435, O94813, P46531, Q4LDE5, Q96H12, P07996, O14594, P98095, Q9Y219, Q9HCU4, Q96GW7, Q14112, P14543, Q9NY15, Q8N2S1, P35354, Q5XG79, P23142, P35555, Q92832, O95967, O75093, O75094, O75095, Q75N90, P13611	4.39145	3.33615e-08	1.66808e-08	1.94517e-07
SMART	SM00326:SH3	1.26183e-05	Q8WUF5, P06239, O94875, O75962, O00499, Q16584, A7KAX9, Q9NZM3, Q13813, P27986, P56945, Q13625, P62993, Q15052, Q8N2Y8, P08631, P06241, P57075, O95153, O60504, P07948	3.10803	0.00274702	0.000916512	0.0160375
SMART	SM00150:SPEC	4.01438e-05	P12814, Q8NF91, O75962, Q03001, Q86VW0, P46939, P35609, Q13813	8.1353	0.00871333	0.00218549	0.0510135
SMART	SM00180:EGF_Lam	0.000261795	Q9HCU4, Q9Y6N6, O15230, Q9NY15, Q5XG79, Q7Z7M0, O75095, P55268	6.15108	0.0554803	0.0113508	0.332249
SMART	SM00282:LamG	0.000474337	Q9HCU4, O15230, O75093, Q5XG79, O75094, Q99435, Q92832, O94813	5.60432	0.0982609	0.0170906	0.601243
SMART	SM00104:ANATO	0.000995476	P23142, P01024, P0C0L4, P98095	18.0139	0.195168	0.0305413	1.25797
SMART	SM00033:CH	0.00155819	P12814, Q9HBI0, Q8NF91, Q15052, Q03001, P21333, P46939, P35609, Q13576	4.05312	0.288194	0.0416036	1.9626
SMART	SM00032:CCP	0.00180312	O60687, Q96GW7, Q4LDE5, P02749, P08603, O14594, P13611, P10643	4.50347	0.325265	0.0427733	2.26785
SMART	SM00041:CT	0.00732136	P29279, P04275, O75093, O75094, O94813	6.30486	0.798492	0.14802	8.91726
SMART	SM00214:VWC	0.00810559	Q9Y219, P29279, P04275, Q99435, P07996, Q92832	4.72865	0.830384	0.148957	9.82766
SMART	SM00252:SH2	0.0084097	P27986, P06239, P07332, P23458, P42224, P62993, P08631, P06241, P40763, P07948	2.84003	0.841352	0.142233	10.1784
SMART	SM00445:LINK	0.0087833	Q96GW7, Q9NY15, O14594, P13611	9.00694	0.853864	0.137517	10.6076
SMART	SM00211:TY	0.0153007	Q14112, P14543, P09758, Q9BQ16	7.41748	0.965311	0.213447	17.7976
SMART	SM00233:PH	0.0299572	Q8N1W1, O95248, Q58EX7, O75962, Q13464, Q5VT25, Q96P48, Q5VST9, Q9H2D6, Q9NZM3, Q9UPU7, Q969R2, Q86UW7, Q15052, Q9UJF2, Q9ULU8	1.8209	0.99868	0.357272	32.0635
SMART	SM00358:DSRM	0.0308658	Q96SI9, P19525, P55265, Q9UPY3	5.73169	0.998924	0.347649	32.8679
SMART	SM00274:FOLN	0.0453705	O75093, Q5XG79, O94813	8.59754	0.99996	0.44867	44.5773
SMART	SM00490:HELICc	0.0504251	O15523, Q9GZR7, O00571, Q14240, P17844, Q9UPY3, Q6ZRS2, Q9H6S0	2.37919	0.999987	0.465615	48.1938
SMART	SM00487:DEXDc	0.0570189	O15523, Q9GZR7, O00571, Q14240, P17844, Q9UPY3, Q6ZRS2, Q9H6S0	2.31371	0.999997	0.490135	52.585
SMART	SM00325:RhoGEF	0.0666215	Q8N1W1, Q58EX7, Q15052, O75962, Q5VST9, Q9NZM3	2.74124	1	0.528339	58.3693
SMART	SM00387:HATPase_c	0.0677648	P07900, P08238, O14874, Q8TE76	4.20324	1	0.517335	59.0128
SMART	SM00240:FHA	0.0733422	P55196, Q14BN4, O96017, Q8N302	4.06765	1	0.529888	62.0228
SMART	SM00186:FBG	0.0791172	P02679, P02675, Q08830, Q15485	3.94054	1	0.542154	64.9238
SMART	SM00456:WW	0.0858202	Q9HAU4, Q14CM0, P46939, Q13576, Q9BYW2	2.97399	1	0.557374	68.0342
SMART	SM00338:BRLZ	0.0858202	P05412, Q16621, Q99941, O43889, P18850	2.97399	1	0.557374	68.0342
SMART	SM00136:LamNT	0.0893325	Q9Y6N6, O15230, P55268	5.91081	1	0.557801	69.5606
SMART	SM00094:TR_FER	0.0918778	P02787, P02788	21.0162	1	0.554286	70.6245
SMART	SM00459:Sorb	0.0918778	O94875, O60504	21.0162	1	0.554286	70.6245
SMART	SM00682:G2F	0.0918778	Q14112, P14543	21.0162	1	0.554286	70.6245
SMART	SM00643:C345C	0.0992034	P01024, Q6FHJ7, P0C0L4	5.56311	1	0.569817	73.4982
